# Supplementary material
Source: ML conference proceedings conference paper supplement (https://proceedings.mlr.press/v89/mariet19a.html)
Supplement: Supplementary file [file mariet19a-supp.pdf]

## A Rademacher complexity

**Definition 6** (Rademacher complexity). Given a family of functions  $\mathcal{F}$  and a training set  $\mathbf{Z} = \{Z_1, \dots, Z_m\}$ , the Rademacher complexity of  $\mathcal{F}$  conditioned on  $\mathbf{Y}'$  is given by

$$\widehat{\mathfrak{R}}_{\mathbf{Z}}(\mathcal{F}) = \mathbb{E}_{\mathbf{Z}, \sigma} \left[ \max_{f \in \mathcal{F}} \frac{1}{m} \sum_{i=1}^m \sigma_i f(Z_i) \mid \mathbf{Y}' \right]$$

where  $\sigma_1, \dots, \sigma_m$  are i.i.d. random variables uniform on  $\{-1, +1\}$ . The Rademacher complexity of  $\mathcal{F}$  for sample size  $m$  is given by

$$\mathfrak{R}_m(\mathcal{F}) = \mathbb{E}_{\mathbf{Y}'} \left[ \widehat{\mathfrak{R}}_{\mathbf{Z}}(\mathcal{F}) \right].$$

The Rademacher complexity has been studied for a variety of function classes. For instance, for the linear hypothesis space  $\mathcal{H} = \{x \rightarrow w^\top x, \|w\|_2 \leq \Lambda\}$ ,  $\widehat{\mathfrak{R}}_{\mathbf{Z}}$  can be upper bounded by  $\widehat{\mathfrak{R}}_{\mathbf{Z}}(\mathcal{H}) \leq \frac{\Lambda}{\sqrt{m}} \max_i \|Z_i\|_2$ . As another example, the hypothesis class of ReLU feed-forward neural networks with  $d$  layers and weight matrices  $W_k$  such that  $\prod_{k=1}^d \|W_k\|_F \leq \gamma$  verifies  $\widehat{\mathfrak{R}}_{\mathbf{Z}}(\mathcal{H}) \leq \frac{2^{d-1/2} \gamma}{\sqrt{m}} \max_i \|Z_i\|_2$  (Neyshabur et al., 2015).

## B Discrepancy analysis

**Proposition 1.** Let  $\mathcal{H}$  be a hypothesis space and let  $L$  be a bounded loss function which respects the triangle inequality. Let  $h' \in \mathcal{H}$ . Then,

$$\Delta \leq \Delta_s + \mathcal{L}(h \mid \mathbf{Y}) + \mathcal{L}(h \mid \mathbf{Y}')$$

*Proof.* Let  $h, h' \in \mathcal{H}$ . For ease of notation, we write

$$\begin{aligned} \Delta_s(h, h', \mathbf{Y}') &= \frac{1}{m} \sum_i L(h(Y_1^T(i)), h'(Y_1^T(i))) \\ &\quad - \frac{1}{m} \sum_i L(h(Y_1^{T-1}(i)), h'(Y_1^{T-1}(i))). \end{aligned}$$

Applying the triangle inequality to  $L$ ,

$$\begin{aligned} \mathcal{L}(h \mid \mathbf{Y}) &= \frac{1}{m} \sum_i \mathbb{E}[L(h(Y_1^T(i)), Y_{T+1}(i)) \mid \mathbf{Y}] \\ &\leq \frac{1}{m} \sum_i L(h(Y_1^T(i)), h'(Y_1^T(i))) \\ &\quad + \frac{1}{m} \sum_i \mathbb{E}[L(h'(Y_1^T(i)), Y_{T+1}(i)) \mid \mathbf{Y}] \\ &= \frac{1}{m} \sum_i L(h(Y_1^T(i)), h'(Y_1^T(i))) + \mathcal{L}(h' \mid \mathbf{Y}). \end{aligned}$$

Then, by definition of  $\Delta_s(h, h', \mathbf{Y}')$ , we have

$$\begin{aligned} \mathcal{L}(h \mid \mathbf{Y}) &\leq \frac{1}{m} \sum_i L(h(Y_1^T(i)), h'(Y_1^T(i))) \\ &\quad - \frac{1}{m} \sum_i L(h(Y_1^{T-1}(i)), h'(Y_1^{T-1}(i))) \\ &\quad + \frac{1}{m} \sum_i L(h(Y_1^{T-1}(i)), h'(Y_1^{T-1}(i))) \\ &\quad + \mathcal{L}(h' \mid \mathbf{Y}) \\ &\leq \Delta_s(h, h', \mathbf{Y}') + \mathcal{L}(h' \mid \mathbf{Y}) \\ &\quad + \frac{1}{m} \sum_i L(h(Y_1^{T-1}(i)), h'(Y_1^{T-1}(i))). \end{aligned}$$

By an application of the triangle inequality to  $L$ ,

$$\begin{aligned} \mathcal{L}(h, \mathcal{D}) &\leq \Delta_s(h, h', \mathbf{Y}') + \mathcal{L}(h' \mid \mathbf{Y}) \\ &\quad + \frac{1}{m} \sum_i \mathbb{E}[L(h(Y_1^{T-1}(i)), Y_T(i)) \mid \mathbf{Y}'] \\ &\quad + \frac{1}{m} \sum_i \mathbb{E}[L(h'(Y_1^{T-1}(i)), Y_T(i)) \mid \mathbf{Y}'] \\ &= \Delta_s(h, h', \mathbf{Y}') + \mathcal{L}(h' \mid \mathbf{Y}) + \mathcal{L}(h \mid \mathbf{Y}') \\ &\quad + \mathcal{L}(h' \mid \mathbf{Y}'). \end{aligned}$$

Finally, we obtain

$$\begin{aligned} \mathcal{L}(h \mid \mathbf{Y}) - \mathcal{L}(h \mid \mathbf{Y}') &\leq \Delta_s(h, h', \mathbf{Y}') + \mathcal{L}(h' \mid \mathbf{Y}) \\ &\quad + \mathcal{L}(h' \mid \mathbf{Y}') \end{aligned}$$

and the result announced in the theorem follows by taking the supremum over  $\mathcal{H}$  on both sides.  $\square$

**Proposition 2.** Let  $I_1, \dots, I_k$  be a partition of  $\{1, \dots, m\}$ , and  $C_1, \dots, C_k$  be the corresponding partition of  $\mathbf{Y}$ . Write  $c = \min_j |C_j|$ . Then we have with probability  $1 - \delta$ ,

$$\begin{aligned} \Delta_s &\leq \Delta_e + \max \left( \max_j \mathfrak{R}_{|C_j|}(\tilde{C}'_j), \max_j \mathfrak{R}_{|C_j|}(\tilde{I}_j) \right) \\ &\quad + \sqrt{\frac{1}{2c} \log \frac{2k}{\delta - \sum_j (|I_j| - 1)[\tilde{\beta}(I_j) + \tilde{\beta}'(I_j)]}}. \end{aligned}$$

*Proof.* By definition of  $\Delta_s$ ,

$$\begin{aligned} \Delta_s &= \sup_{h, h' \in \mathcal{H}} \frac{1}{m} \sum_{i=1}^m \left[ L(h(Y_1^T(i)), h'(Y_1^T(i))) \right. \\ &\quad \left. - L(h(Y_1^{T-1}(i)), h'(Y_1^{T-1}(i))) \right] \\ &\leq \sup_{h, h' \in \mathcal{H}} \left[ \frac{1}{m} \sum_{i=1}^m L(h(Y_1^T(i)), h'(Y_1^T(i))) \right. \\ &\quad \left. - \mathbb{E}_Y[L(h(Y_1^T), h'(Y_1^T))] \right] \\ &\quad + \sup_{h, h' \in \mathcal{H}} \left[ \mathbb{E}_Y[L(h(Y_1^T), h'(Y_1^T))] \right. \\ &\quad \left. - \mathbb{E}_Y[L(h(Y_1^{T-1}), h'(Y_1^{T-1}))] \right] \\ &\quad + \sup_{h, h' \in \mathcal{H}} \left[ \mathbb{E}_Y[L(h(Y_1^{T-1}), h'(Y_1^{T-1}))] \right. \\ &\quad \left. - \frac{1}{m} \sum_{i=1}^m L(h(Y_1^{T-1}(i)), h'(Y_1^{T-1}(i))) \right] \end{aligned}$$

by sub-additivity of the supremum. Now, define

$$\begin{aligned} \phi(\mathbf{Y}) &\triangleq \sup_{h, h' \in \mathcal{H}} \left[ \frac{1}{m} \sum_{i=1}^m L(h(Y_1^T(i)), h'(Y_1^T(i))) \right. \\ &\quad \left. - \mathbb{E}_Y[L(h(Y_1^T), h'(Y_1^T))] \right] \end{aligned}$$

$$\begin{aligned} \psi(\mathbf{Y}') &\triangleq \sup_{h, h' \in \mathcal{H}} \left[ \mathbb{E}_Y[L(h(Y_1^{T-1}), h'(Y_1^{T-1}))] \right. \\ &\quad \left. - \frac{1}{m} \sum_{i=1}^m L(h(Y_1^{T-1}(i)), h'(Y_1^{T-1}(i))) \right]. \end{aligned}$$

By definition of  $\Delta_e$ , we have from the previous inequality

$$\Delta_s \leq \Delta_e + \phi(\mathbf{Y}_1^T) + \psi(\mathbf{Y}_1^{T-1}).$$

We now proceed to give a high-probability bound for  $\phi$ ; the same reasoning will yield a bound for  $\psi$ . By sub-additivity of the max,

$$\begin{aligned} \phi(\mathbf{Y}) &\leq \sum_j \frac{|C_j|}{m} \sup_{h \in \mathcal{H}} \left[ \mathbb{E}_Y[f(h, Y_1^T)] \right. \\ &\quad \left. - \frac{1}{|C_j|} \sum_{Y \in C_j} f(h, Y_1^T) \right] \\ &\leq \sum_j \frac{|C_j|}{m} \phi(C_j) \end{aligned}$$

and so by union bound, for  $\epsilon > 0$

$$\Pr(\phi(\mathbf{Y}) > \epsilon) \leq \sum_j \Pr(\phi(C_j) > \epsilon).$$

Let  $\epsilon > \max_j \mathbb{E}[\phi(\tilde{C}_j)]$  and set  $\epsilon_j = \epsilon - \mathbb{E}[\phi(\tilde{C}_j)]$ .

Define for time series  $Y(i), Y(j)$  the mixing coefficient

$$\bar{\beta}(i, j) = \|\Pr(Y_1^T(i), Y_1^T(j)) - \Pr(Y_1^T(i)) \Pr(Y_1^T(j))\|_{TV}$$

where we also extend the usual notation to  $\bar{\beta}(C_j)$ .

$$\begin{aligned} \Pr(\phi(C_j) > \epsilon) &= \Pr\left(\phi(C_j) - \mathbb{E}[\phi(\tilde{C}_j)] > \epsilon_j\right) \\ &\stackrel{(a)}{\leq} \Pr\left(\phi(\tilde{C}_j) \right. \\ &\quad \left. - \mathbb{E}[\phi(\tilde{C}_j)] > \epsilon_j\right) + (|I_j| - 1)\bar{\beta}(I_j) \\ &\stackrel{(b)}{\leq} e^{-2c\epsilon_j^2} + (|I_j| - 1)\bar{\beta}(I_j), \end{aligned}$$

where (a) follows by applying Prop. 6 to the indicator function of the event  $\Pr(\phi(C_j) - \mathbb{E}[\phi(\tilde{C}_j)] \geq \epsilon)$ , and (b) is a direct application of McDiarmid's inequality to  $\phi(\tilde{C}_j) - \mathbb{E}[\phi(\tilde{C}_j)]$ .

Hence, by summing over  $j$  we obtain

$$\begin{aligned} \Pr(\phi(\mathbf{Y}) > \epsilon) &\leq k e^{-2 \min_j |C_j| (\epsilon - \max_j \mathbb{E}[\phi(\tilde{C}_j)])^2} \\ &\quad + \sum_j (|I_j| - 1)\bar{\beta}(I_j) \end{aligned}$$

and similarly

$$\begin{aligned} \Pr(\psi(\mathbf{Y}') > \epsilon) &\leq k e^{-2 \min_j |C'_j| (\epsilon - \max_j \mathbb{E}[\psi(\tilde{C}'_j)])^2} \\ &\quad + \sum_j (|I_j| - 1)\bar{\beta}'(I_j), \end{aligned}$$

which finally yields

$$\begin{aligned} \Pr(\Delta_s - \Delta_e > \epsilon) &\leq \Pr(\phi(\mathbf{Y}) > \epsilon) + \Pr(\psi(\mathbf{Y}') > \epsilon) \\ &\leq 2k \exp(-2c(\epsilon - \max_j \mathbb{E}[\phi(\tilde{C}_j)], \max_j \mathbb{E}[\psi(\tilde{C}'_j)]))^2 \\ &\quad + \sum_j (|I_j| - 1)[\bar{\beta}(I_j) + \bar{\beta}'(I'_j)], \end{aligned}$$

where we recall that we write  $c = \min_j |C_j|$ . We invert the previous equation by setting

$$\begin{aligned} \epsilon &= \max(\max_j \mathbb{E}[\phi(\tilde{C}_j)], \max_j \mathbb{E}[\psi(\tilde{C}'_j)]) \\ &\quad + \sqrt{\frac{1}{2c} \log \frac{2k}{\delta - \sum_j (|I_j| - 1)[\bar{\beta}(I_j) + \bar{\beta}'(I'_j)]}}, \end{aligned}$$

yielding with probability  $1 - \delta$ ,

$$\begin{aligned} \Delta_s &\leq \Delta_e + \max(\max_j \mathbb{E}[\phi(\tilde{C}_j)], \max_j \mathbb{E}[\psi(\tilde{C}'_j)]) \\ &\quad + \sqrt{\frac{1}{2c} \log \frac{2k}{\delta - \sum_j (|I_j| - 1)[\bar{\beta}(I_j) + \bar{\beta}'(I'_j)]}}. \end{aligned}$$

We now bound  $\mathbb{E}[\phi(\tilde{C}_j)]$  by  $\mathfrak{R}_{|C_j|}(\tilde{C}_j)$ . A similar argument yields the bound for  $\psi$ . By definition, we have

$$\begin{aligned}\mathbb{E}[\phi(\tilde{C}_j)] &= \mathbb{E}\left[\sup_{h \in \mathcal{H}} \frac{1}{|C_j|} \sum_{Z \in \tilde{C}_j} f(h, Y_1^T(i)) - \mathbb{E}_Y[f(h, Y_1^T)]\right] \\ &= \frac{1}{|C_j|} \mathbb{E}\left[\sup_{h \in \mathcal{H}} \sum_{Z \in \tilde{C}_j} \underbrace{f(h, Y_1^T(i)) - \mathbb{E}_Y[f(h, Y_1^T)]}_{g(h, Y_1^T(i))}\right] \\ &= \frac{1}{|C_j|} \mathbb{E}\left[\sup_{h \in \mathcal{H}} \sum_{Z \in \tilde{C}_j} g(h, Y_1^T(i))\right]\end{aligned}$$

Standard symmetrization arguments as those used for the proof of the famous result by [Koltchinskii and Panchenko \(2002\)](#), which hold also when data is drawn independently but not identically at random, yield

$$\mathbb{E}[\phi(\tilde{C}_j)] \leq \mathfrak{R}_{|C_j|}(\tilde{C}_j).$$

The same argument yields for  $\psi$

$$\mathbb{E}[\psi(\tilde{C}'_j)] \leq \mathfrak{R}_{|C_j|}(\tilde{C}'_j).$$

To conclude our proof, it only remains to prove the bound

$$\begin{aligned}\bar{\beta}(i, j) &\leq \beta_{s2s}(i, j) \\ &\quad + \mathbb{E}_{\mathbf{Y}'} \left[ \text{Cov} \left( \Pr(Y_T(i) | \mathbf{Y}'), \Pr(Y_T(j) | \mathbf{Y}') \right) \right]\end{aligned}$$

Let  $Y(i), Y(j)$  be two time series, and write  $X_i = \mathbb{E}[\Pr(Y_1^T(i) | \mathbf{Y}')]$ . Then the following bound holds

$$\begin{aligned}\bar{\beta}(i, j) &= \|\Pr(Y_1^T(i), Y_1^T(j)) - \Pr(Y_1^T(i)) \Pr(Y_1^T(j))\|_{TV} \\ &= \|\mathbb{E}[\Pr(Y_1^T(i), Y_1^T(j) | \mathbf{Y}')] - \mathbb{E}[X_i] \mathbb{E}[X_j]\|_{TV} \\ &= \|\mathbb{E}[\Pr(Y_1^T(i), Y_1^T(j) | \mathbf{Y}_1^{T-1})] - \mathbb{E}[X_i, X_j] \\ &\quad - \mathbb{E}[\text{Cov}(X_i, X_j)]\|_{TV} \\ &\leq \beta_{s2s}(i, j) + \mathbb{E}_{\mathbf{Y}'}[\text{Cov}(X_i, X_j)],\end{aligned}$$

which is the desired inequality.  $\square$

We now show two useful lemmas for various specific cases of time series and hypothesis spaces.

**Proposition 3.** *If  $Y(i)$  is stationary for all  $1 \leq i \leq m$ , and  $\mathcal{H}$  is a hypothesis space such that  $h \in \mathcal{H} : \mathcal{Y}^{T-1} \rightarrow \mathcal{Y}$  (i.e. the hypotheses only consider the last  $T-1$  values of  $Y$ ), then  $\Delta_e = 0$ .*

*Proof.* Let  $h, h' \in \mathcal{H}$ . For stationary  $Y(i)$ , we have  $\Pr(Y_1^T(i)) = \Pr(Y_2^T(i))$ , and so

$$\mathbb{E}[L(h(Y_2^T), h'(Y_2^T))] - \mathbb{E}[L(h(Y_1^{T-1}), h'(Y_1^{T-1}))] = 0$$

and so taking the supremum over  $h, h'$  yields the desired result.  $\square$

**Proposition 4.** *If  $Y(i)$  is covariance stationary for all  $1 \leq i \leq m$ ,  $L$  is the squared loss, and  $\mathcal{H}$  is a linear hypothesis space  $\{x \rightarrow w \cdot x \mid \|w\| \in \mathbb{R}^p \leq \Lambda\}$ , then  $\Delta_e = 0$ .*

*Proof.* Recall that a time series  $Y$  is covariance stationary if  $\mathbb{E}_Y[Y_t]$  does not depend on  $t$  and  $\mathbb{E}_Y[Y_t Y_s] = f(t-s)$  for some function  $f$ .

Let now  $(h, h') \in \mathcal{H} \equiv (w, w') \in \mathbb{R}^p$ . We write  $\Sigma = \Sigma_2^T(Y) = \Sigma_1^T(Y)$  the covariance matrix of  $Y$  where the equality follows from covariance stationarity. Without loss of generality, we consider  $p = T-1$ . Then,

$$\begin{aligned}\mathbb{E}[L(h(Y_2^T), h'(Y_2^T))] - \mathbb{E}[L(h(Y_1^{T-1}), h'(Y_1^{T-1}))] \\ &= \mathbb{E}[(w - w')^\top \Sigma_2^T(Y)(w - w')] \\ &\quad - \mathbb{E}[(w - w')^\top \Sigma_1^{T-1}(Y)(w - w')] \\ &= 0.\end{aligned}$$

Taking the supremum over  $h, h'$  yields the desired result.  $\square$

**Proposition 5.** *If the  $Y(i)$  are periodic of period  $p$  and the observed starting time of each  $Y(i)$  is distributed uniformly at random in  $[p]$ , then  $\Delta_e = 0$ .*

*Proof.* This proof is similar to the stationary case: indeed, we can write  $\Pr(Y_1^{T-1}(i)) = \frac{1}{p} \Pr(Y(i))$  due to the uniform distribution on starting times. Then, by the same reasoning, we have also

$$\Pr(Y_2^T(i)) = \frac{1}{p} \Pr(Y(i)) = \Pr(Y_1^{T-1}(i)),$$

from which the result follows.  $\square$

## C Generalization bounds

**Proposition 6.** [Yu \(1994, Corollary 2.7\)](#). *Let  $f$  be a real-valued Borel measurable function such that  $0 \leq f \leq 1$ . Then, we have the following guarantee:*

$$\left| \mathbb{E}[f(\tilde{C})] - \mathbb{E}[f(C)] \right| \leq (|C|-1)\beta,$$

where  $\beta$  is the total variation distance between joint distributions of  $C$  and  $\tilde{C}$ .

**Theorem 4.1.** *Let  $\mathcal{H}$  be a hypothesis space, and  $h \in \mathcal{H}$ . Let  $C_1, \dots, C_k$  form a partition of the training input  $\mathbf{Y}_1^T$ , and consider that the loss function  $L$  is bounded by 1. Then, we have for  $\delta > 0$ , with probability  $1 - \delta$ ,*

$$\begin{aligned}\Phi_{s2s}(h) &\leq \Delta + \max_j \left[ \mathfrak{R}_{|C_j|}(\tilde{C}_j | \mathbf{Y}) \right] \\ &\quad + \frac{1}{\sqrt{2 \min_j |I_j|}} \sqrt{\log \left( \frac{k}{\delta - \sum_j (|I_j|-1)\beta_{s2s}(I_j)} \right)}.\end{aligned}$$

For ease of notation, we write

$$\begin{aligned}\phi(\mathbf{Y}) &= \sup_{h \in \mathcal{H}} \mathcal{L}(h \mid \mathbf{Y}') - \widehat{\mathcal{L}}(h, \mathbf{Y}) \\ &= \sup_{h \in \mathcal{H}} \frac{1}{m} \sum_{i=1}^m \mathbb{E}[f(h, Y_1^T(i)) \mid \mathbf{Y}'] \\ &\quad - \frac{1}{m} \sum_{i=1}^m f(h, Y_1^T(i)).\end{aligned}$$

We begin by proving the following lemma.

**Lemma 3.** *Let  $\bar{\mathbf{Y}}$  be equal to  $\mathbf{Y}$  on all time series except for the last, where we have  $\bar{Y}(m) = Y(m)$  at all times except for time  $t = T$ . Then*

$$|\phi(\mathbf{Y}) - \phi(\bar{\mathbf{Y}})| \leq \frac{1}{m}$$

*Proof.* Fix  $h^* \in \mathcal{H}$ . Then,

$$\begin{aligned}\mathcal{L}(h^* \mid \mathbf{Y}') - \widehat{\mathcal{L}}(h^*, \mathbf{Y}) - \sup_{h \in \mathcal{H}} \left[ \mathcal{L}(h \mid \bar{\mathbf{Y}}') - \widehat{\mathcal{L}}(h, \bar{\mathbf{Y}}) \right] \\ \leq \mathcal{L}(h^* \mid \mathbf{Y}') - \widehat{\mathcal{L}}(h^*, \mathbf{Y}) \\ - \left[ \mathcal{L}(h^* \mid \bar{\mathbf{Y}}') - \widehat{\mathcal{L}}(h^*, \bar{\mathbf{Y}}) \right] \\ \stackrel{(a)}{\leq} \widehat{\mathcal{L}}(h^*, \bar{\mathbf{Y}}) - \widehat{\mathcal{L}}(h^*, \mathbf{Y}) \\ \leq \frac{1}{m} \left[ f(h^*, \bar{Y}_1^T(m)) - f(h^*, Y_1^T(m)) \right] \leq \frac{1}{m}.\end{aligned}$$

where (a) follows from the fact that  $\mathbf{Y}' = \bar{\mathbf{Y}}'$  and the last inequality follows from the fact that  $f$  is bounded by 1.

By taking the supremum over  $h^*$ , the previous calculations show that  $\phi(\mathbf{Y}) - \phi(\bar{\mathbf{Y}}) \leq 1/m$ ; by symmetry, we obtain  $\phi(\bar{\mathbf{Y}}) - \phi(\mathbf{Y}) \leq 1/m$  which proves the lemma.  $\square$

We now prove the main theorem.

*Proof.* Observe that the following bounds holds

$$\begin{aligned}\Phi_{s2s}(\mathbf{Y}) &= \mathcal{L}(h \mid \mathbf{Y}) - \widehat{\mathcal{L}}(h, \mathbf{Y}) \\ &\leq \sup_{h \in \mathcal{H}} \left[ \mathcal{L}(h \mid \mathbf{Y}) - \mathcal{L}(h \mid \mathbf{Y}') \right] \\ &\quad + \sup_{h \in \mathcal{H}} \left[ \mathcal{L}(h \mid \mathbf{Y}') - \widehat{\mathcal{L}}(h, \mathbf{Y}) \right].\end{aligned}$$

and so

$$\Phi_{s2s}(\mathbf{Y}) - \Delta \leq \underbrace{\sup_{h \in \mathcal{H}} \mathcal{L}(h, \mid \mathbf{Y}') - \widehat{\mathcal{L}}(h, \mathbf{Y})}_{\phi(\mathbf{Y})}.$$

Define  $M = \max_j \mathbb{E}[\phi(\tilde{C}_j) \mid \tilde{\mathbf{Y}}']$ . Then,

$$\begin{aligned}\Pr\left(\Phi_{s2s}(\mathbf{Y}) - \Delta - M > \epsilon \mid \mathbf{Y}'\right) \\ \leq \Pr(\phi(\mathbf{Y}) - M > \epsilon \mid \mathbf{Y}').\end{aligned} \quad (\text{C.1})$$

By sub-additivity of the supremum, we have

$$\phi(\mathbf{Y}) - M \leq \sum_j \frac{|C_j|}{m} \sup_{h \in \mathcal{H}} \left[ \mathcal{L}(h \mid \mathbf{Y}) - \widehat{\mathcal{L}}(h, C_j) - M \right]$$

and so by union bound,

$$\Pr(\phi(\mathbf{Y}) - M \geq \epsilon \mid \mathbf{Y}') \leq \sum_j \Pr(\phi(C_j) - M \geq \epsilon \mid \mathbf{Y}').$$

By definition of  $M$ ,

$$\begin{aligned}\Pr\left(\phi(C_j) - M \geq \epsilon \mid \mathbf{Y}'\right) \\ \leq \Pr(\phi(C_j) - \mathbb{E}[\phi(\tilde{C}_j) \mid \tilde{\mathbf{Y}}'] \geq \epsilon \mid \mathbf{Y}') \\ \stackrel{(a)}{\leq} \Pr(\phi(\tilde{C}_j) \\ - \mathbb{E}[\phi(\tilde{C}_j) \mid \tilde{\mathbf{Y}}'] \geq \epsilon \mid \mathbf{Y}') + (|I_j| - 1)\beta_{s2s}(I_j \mid \mathbf{Y}') \\ \stackrel{(b)}{\leq} e^{-2|C_j|\epsilon^2} + (|I_j| - 1)\beta_{s2s}(I_j \mid \mathbf{Y}').\end{aligned}$$

where (a) follows by applying Prop. 6 to the indicator function of the event  $\Pr(\phi(C_j) - \mathbb{E}[\phi(\tilde{C}_j) \mid \tilde{\mathbf{Y}}'] \geq \epsilon)$ , and (b) is a direct application of McDiarmid's inequality, following Lemma 3. The notation  $\beta_{s2s}(I_j \mid \mathbf{Y}')$  indicates the total variation distance between the joint distributions of  $C_j$  and  $\tilde{C}_j$  conditioned on  $\mathbf{Y}'$ . In particular, we have  $\mathbb{E}_{\mathbf{Y}'}\beta_{s2s}(C_j \mid \mathbf{Y}') = \beta_{s2s}(C_j)$ .

Finally, taking the expectation of the previous term over all possible  $\mathbf{Y}'$  values and summing over  $j$ , we obtain

$$\begin{aligned}\Pr(\mathcal{L}(h \mid \mathbf{Y}) - \widehat{\mathcal{L}}(h, \mathbf{Y}) - \mathbb{E}_{\tilde{C}_j'}[\phi(\tilde{C}_j') \mid \tilde{\mathbf{Y}}] \geq \epsilon) \\ \leq \sum_j e^{-2|C_j|\epsilon^2} + \sum_j (|I_j| - 1)\beta_{s2s}(I_j).\end{aligned}$$

Combining this bound with (C.1), we obtain

$$\begin{aligned}\Pr\left(\Phi_{s2s}(\mathbf{Y}) - \Delta - M > \epsilon\right) \\ \leq \sum_j e^{-2|C_j|\epsilon^2} + \sum_j (|I_j| - 1)\beta_{s2s}(I_j) \\ \leq ke^{-2\min_j |C_j|\epsilon^2} + \sum_j (|I_j| - 1)\beta_{s2s}(I_j)\end{aligned}$$

We invert the previous equation by choosing  $\delta > \sum_j (|I_j| - 1)\beta_{s2s}(I_j)$  and setting

$$\epsilon = \sqrt{\frac{\log \frac{k}{\delta - \sum_j (|I_j| - 1)\beta_{s2s}(I_j)}}{2\min_j |I_j|}},$$

which yields that with probability  $1 - \delta$ , we have

$$\Phi_{s2s}(Z) \leq M + \Delta + \sqrt{\frac{\log \left( \frac{k}{\delta - \sum_j (|I_j| - 1)\beta_{s2s}(I_j)} \right)}{2\min_j |I_j|}}.$$

To conclude our proof, it remains to show that

$$M \leq \mathfrak{R}_{|C_j|}(\tilde{C}_j \mid \tilde{\mathbf{Y}}').$$

$$\begin{aligned} \mathbb{E}[\phi(\tilde{C}_j) \mid \tilde{\mathbf{Y}}'] &= \mathbb{E}\left[\sup_{h \in \mathcal{H}} \mathcal{L}(h \mid \tilde{\mathbf{Y}}') \right. \\ &\quad \left. - \frac{1}{|C_j|} \sum_{i=1}^m f(h, \tilde{Y}_1^T(i)) \mid \tilde{\mathbf{Y}}'\right] \\ &= \frac{1}{|C_j|} \mathbb{E}\left[\sup_{h \in \mathcal{H}} \sum_{\tilde{Y}_1^T \in \tilde{C}_j} \mathbb{E}[f(h, \tilde{Y}_1^T) \mid \tilde{\mathbf{Y}}'] \right. \\ &\quad \left. - f(h, \tilde{Y}_1^T(i)) \mid \tilde{\mathbf{Y}}'\right] \\ &\leq \frac{1}{|C_j|} \mathbb{E}\left[\sup_{h \in \mathcal{H}} \sum_{\tilde{Y}_1^T \in \tilde{C}_j} g(h, \tilde{Y}_1^T(i)) \mid \tilde{\mathbf{Y}}'\right] \end{aligned}$$

where we've defined

$$g(h, \tilde{Y}_1^T(i)) \triangleq \mathbb{E}[f(h, \tilde{Y}_1^T(i)) \mid \tilde{\mathbf{Y}}'] - f(h, \tilde{Y}_1^T(i)).$$

Similar arguments to those used at the end of Appendix B yield the desired result, which concludes the proof of Theorem 4.1.  $\square$

## D Generalization bounds for local models

**Theorem 5.1.** *Let  $h = (h_1, \dots, h_m)$  where each  $h_i$  is a hypothesis learned via a local method to predict the univariate time series  $Z_i$ . For  $\delta > 0$  and any  $\alpha > 0$ , we have w.p. with  $1 - \delta$*

$$\begin{aligned} \Phi_{loc}(\mathbf{Z}) &\leq \frac{1}{m} \sum_i \Delta(Y(i)) + 2\alpha \\ &\quad + \sqrt{\frac{2}{T} \log \frac{m \max_i (\mathbb{E}_{v \sim T(Y(i))} [\mathcal{N}_1(\alpha, \mathcal{F}, v)])}{\delta}} \end{aligned}$$

*Proof.* Write

$$\begin{aligned} \Phi(Y_1^T(i)) &= \sup_{h \in \mathcal{H}} \mathbb{E}[f(h, Y_1^{T+1}) \mid Y_1^T] \\ &\quad - \frac{1}{T} \sum_{t=1}^T f(h, Y_t^{t+T}(i)). \end{aligned}$$

By (Kuznetsov and Mohri, 2015, Theorem 1), we have that for  $\epsilon > 0$ , and  $1 \leq i \leq m$ ,

$$\begin{aligned} \Pr(\Phi(Y_1^T(i)) - \Delta(Y(i)) > \epsilon) &\leq \mathbb{E}_{v \sim T(p)} [\mathcal{N}_1(\alpha, \mathcal{F}, v)] \\ &\quad \times \exp\left(-\frac{T(\epsilon - 2\alpha)^2}{2}\right). \end{aligned}$$

By union bound,

$$\begin{aligned} \Pr\left(\frac{1}{m} \sum_i \Phi(Y_1^T(i)) - \Delta(Y(i)) > \epsilon\right) \\ \leq m \max_i (\mathbb{E}_{v \sim T(Y(i))} [\mathcal{N}_1(\alpha, \mathcal{F}, v)]) \\ \times \exp\left(-\frac{T(\epsilon - 2\alpha)^2}{2}\right) \end{aligned}$$

We invert the previous equation by letting

$$\epsilon = 2\alpha + \sqrt{\frac{2}{T} \log \frac{m \max_i (\mathbb{E}_{v \sim T(Y(i))} [\mathcal{N}_1(\alpha, \mathcal{F}, v)])}{\delta}}.$$

which yields the desired result.  $\square$

## E Analysis of expected mixing coefficients

**Lemma 2.** *Two AR processes  $Y(i), Y(j)$  generated by (4.1) such that  $\sigma = \text{Cov}(Y(i), Y(j)) \leq \sigma_0 < 1$  verify  $\beta_{s2s}(i, j) = \max\left(\frac{3}{2(1-\sigma_0^2)}, \frac{1}{1-2\sigma_0}\right) \sigma$ .*

*Proof.* For simplicity, we write  $U = Y(i)$  and  $V = Y(j)$ .

Write

$$\begin{aligned} \beta &= \|P(U_T | \mathbf{Y}') P(V_T | \mathbf{Y}') - P(U_T, V_T | \mathbf{Y}')\|_{TV} \\ &= \sup_{u, v} |P(U_T = u) P(V_T = v) - P(U_T = u, V_T = v)| \\ &= \sup_{u, v} \left| P(U_T = u \mid U_0^{T-1}) P(V_T = v \mid V_0^{T-1}) \right. \\ &\quad \left. - P(U_T = u, V_T = v \mid U_0^{T-1}, V_0^{T-1}) \right| \\ &= \sup_{u, v} \left| \left[ P(u, v \mid U_0^{T-1}, V_0^{T-1}) + f(\sigma, \delta, \epsilon) \right] \right. \\ &\quad \left. - P(u, v \mid U_0^{T-1}, V_0^{T-1}) \right| \end{aligned}$$

where we've written  $\delta = u - \Theta_i(U_0^{T-1})$  (and  $\epsilon$  similarly for  $v$ ), and we've defined

$$\begin{aligned} f(\sigma, \delta, \epsilon) &= P(u | U_0^{T-1}) P(v | V_0^{T-1}) - P(u, v | U_0^{T-1}, V_0^{T-1}) \\ &= e^{-\frac{1}{2}(\delta^2 + \epsilon^2)} - \frac{1}{1 - \sigma^2} e^{-\frac{1}{2} \frac{1}{1 - \sigma^2} (\delta^2 + \epsilon^2 - 2\sigma\epsilon\delta)}. \end{aligned}$$

Assuming we can bound  $f(\sigma, \delta, \epsilon)$  by a function  $g(\sigma)$  independent of  $\delta, \epsilon$ , we can then derive a bound on  $\beta$ .

Let  $x = \sqrt{\delta^2 + \epsilon^2}$  be a measure of how far the AR process noises lie from their mean  $\mu = 0$ . Using the inequality

$$|\delta\epsilon| \leq \delta^2 + \epsilon^2,$$

we proceed to bound  $|f(\sigma, \delta, \epsilon)|$  by bounding  $f$  and  $-f$ .

$$\begin{aligned}
 f(\sigma, \delta, \epsilon) &\leq e^{-\frac{1}{2}(\delta^2 + \epsilon^2)} - e^{-\frac{1}{2}\frac{1}{1-\sigma^2}(\delta^2 + \epsilon^2 + 2\sigma|\delta\epsilon|)} \\
 &\leq e^{-\frac{1}{2}x^2} - e^{-\frac{1}{2}\frac{1}{1-\sigma^2}(1+2\sigma)x^2} \\
 &\leq e^{-\frac{1}{2}x^2} \left(1 - e^{-\frac{1}{2}\frac{2\sigma + \sigma^2}{1-\sigma^2}x^2}\right)
 \end{aligned}$$

Using the inequality  $1 - x \leq e^{-x}$ , it then follows that

$$\begin{aligned}
 f(\sigma, \delta, \epsilon) &\leq e^{-\frac{1}{2}x^2} \left(1 - \left(1 - \frac{1}{2}\frac{2\sigma + \sigma^2}{1-\sigma^2}x^2\right)\right) \\
 &\leq \frac{1}{2}\frac{3}{1-\sigma^2}\sigma x^2 e^{-\frac{1}{2}x^2} \\
 &\stackrel{(a)}{\leq} \frac{3}{e(1-\sigma^2)}\sigma \tag{E.1}
 \end{aligned}$$

where inequality (a) follows from the fact that  $y \rightarrow ye^{-y}$  is bounded by  $1/e$ .

Similarly, we now bound  $-f$ :

$$\begin{aligned}
 -f(\sigma, \delta, \epsilon) &\leq \frac{1}{1-\sigma^2}e^{-\frac{1}{2}\frac{1}{1-\sigma^2}(\delta^2 + \epsilon^2 - 2\sigma|\delta\epsilon|)} - e^{-\frac{1}{2}(\delta^2 + \epsilon^2)} \\
 &\leq \frac{1}{1-\sigma^2}e^{-\frac{1}{2}\frac{1-2\sigma}{1-\sigma^2}x^2} - e^{-\frac{1}{2}x^2} \\
 &\leq \frac{1}{1-\sigma^2}e^{-\frac{1}{2}(1-2\sigma)x^2} - e^{-\frac{1}{2}x^2}.
 \end{aligned}$$

One shows easily that this last function reaches its maximum for  $x_0^2 = \frac{1}{\sigma} \log\left(\frac{1-\sigma^2}{1-2\sigma}\right)$ , at which point it verifies

$$-f(\sigma, x_0) = \frac{2\sigma}{1-2\sigma}e^{-\frac{1}{2\sigma} \log\left(\frac{1-\sigma^2}{1-2\sigma}\right)} \leq \frac{2\sigma}{1-2\sigma} \tag{E.2}$$

Putting (E.1) and (E.2) together, we obtain

$$\begin{aligned}
 |f(\sigma, \delta, \epsilon)| &\leq \sigma \max\left(\frac{3}{e(1-\sigma^2)}, \frac{1}{1-2\sigma}\right) \\
 &\leq \max\left(\frac{3}{2(1-\sigma_0^2)}, \frac{1}{1-2\sigma_0}\right)\sigma
 \end{aligned}$$

Taking the expectation over all possible realizations of  $\mathbf{Y}'$  yields the desired result.  $\square$

*Proof.* Recall that  $\mathbf{Y}$  contains  $m' = mT$  examples, which we denote  $Y_{t-p}^t(i)$  for  $1 \leq i \leq m$  and  $1 \leq t \leq T$  (when  $t - p < 0$ , we truncate the time series appropriately). We define

$$\mathcal{L}_{\text{hyb}}(h | \mathbf{Y}) = \frac{1}{m} \sum_{i=1}^m \mathbb{E}[L(h(Y_{T-p+1}^T(i)), Y_{T+1}(i)) | \mathbf{Y}]$$

$$\mathcal{L}_{\text{hyb}}(h | \mathbf{Y}') = \frac{1}{m} \sum_{i=1}^m \frac{1}{T} \sum_{t=1}^T \mathbb{E}[L(h(Y_{t-p}^{t-1}(i)), Y_t(i)) | \mathbf{Y}']$$

$$\widehat{\mathcal{L}}_{\text{hyb}}(h) = \frac{1}{m} \sum_{i=1}^m \frac{1}{T} \sum_{t=1}^T L(h(Y_{t-p}^{t-1}(i)), Y_t(i))$$

where we note that here  $\mathbf{Y}'$  indicates each of the  $mT$  training samples excluding their last time point.

Observe that the following chain of inequalities holds:

$$\begin{aligned}
 \Phi_{\text{hyb}}(\mathbf{Y}) &= \sup_{h \in \mathcal{H}} \mathcal{L}_{\text{hyb}}(h | \mathbf{Y}) - \widehat{\mathcal{L}}_{\text{hyb}}(h) \\
 &\leq \sup_{h \in \mathcal{H}} \left[ \mathcal{L}_{\text{hyb}}(h | \mathbf{Y}) - \mathcal{L}_{\text{hyb}}(h | \mathbf{Y}') \right] \\
 &\quad + \sup_{h \in \mathcal{H}} \left[ \mathcal{L}_{\text{hyb}}(h | \mathbf{Y}') - \widehat{\mathcal{L}}_{\text{hyb}}(h, \mathbf{Y}) \right] \\
 &\leq \frac{1}{T} \sum_{t=1}^T \sup_{h \in \mathcal{H}} \left[ \mathcal{L}_{\text{hyb}}(h | \mathbf{Y}) \right. \\
 &\quad \left. - \frac{1}{m} \sum_{i=1}^m \mathbb{E}_{\mathcal{D}'}[L(h(Y_{t-p}^{t-1}(i)), Y_t(i)) | \mathbf{Y}'] \right] \\
 &\quad + \sup_{h \in \mathcal{H}} \left[ \mathcal{L}_{\text{hyb}}(h | \mathbf{Y}') - \widehat{\mathcal{L}}_{\text{hyb}}(h, \mathbf{Y}) \right].
 \end{aligned}$$

and so

$$\Phi_{\text{hyb}}(\mathbf{Y}) - \frac{1}{T} \sum_t \Delta_t \leq \underbrace{\sup_{h \in \mathcal{H}} \mathcal{L}_{\text{hyb}}(h, | \mathbf{Y}') - \widehat{\mathcal{L}}_{\text{hyb}}(h, \mathbf{Y})}_{\phi(\mathbf{Y})}.$$

Then, following the exact same reasoning as above for  $\Phi_{\text{s2s}}$  shows that for  $\delta > 0$ , we have with probability  $1 - \delta/2$

$$\begin{aligned}
 \Phi_{\text{hyb}}(\mathbf{Y}) &\leq \underbrace{\max_j \widehat{\mathfrak{R}}_{\tilde{\mathcal{C}}_j}(\mathcal{F}) + \frac{1}{T} \sum_t \Delta_t + \sqrt{\frac{\log\left(\frac{2k}{\delta - \sum_j (|I_j| - 1)\beta(I_j)}\right)}{2 \min_j |I_j|}}}_{B_1}
 \end{aligned}$$

However, upper bounding  $\Phi_{\text{hyb}}$  can also be approached using the same techniques as [Kuznetsov and Mohri \(2015\)](#), which we now describe. Let  $\alpha > 0$ . For a given  $h$ , computing  $\mathcal{L}_{\text{hyb}}(h, \mathbf{Y})$  is similar in expectation to running  $h$  on each of the  $m$  time series, yielding for each time series  $Y_{T-p+1}^T(i)$  the bound

$$\begin{aligned}
 &\mathbb{E}[L(h(Y_{T-p+1}^T(i)), Y_{T+1}(i)) | \mathbf{Y}] \\
 &\leq \frac{1}{T} \sum_{t=1}^T L(h(Y_{t-p}^{t-1}(i)), Y_t(i)) + \Delta(\mathbf{Y}_i) \\
 &\quad + 2\alpha + \sqrt{\frac{2}{T} \log \frac{\max_i \mathbb{E}_{v \sim T(\mathbf{Y}_i)}[\mathcal{N}_i(\alpha, \mathcal{F}, v)]}{\delta}}
 \end{aligned}$$

and so by union bound, as above, we obtain with probability  $1 - \delta/2$

$$\begin{aligned}
 \Phi_{\text{hyb}}(\mathbf{Y}) &\leq \frac{1}{m} \sum \Delta(\mathbf{Y}_i) + 2\alpha \\
 &\quad + \sqrt{\frac{2}{T} \log \frac{2m \max_i \mathbb{E}_{v \sim T(\mathbf{Y}_i)}[\mathcal{N}_i(\alpha, \mathcal{F}, v)]}{\delta}} \\
 &\leq B_2
 \end{aligned}$$

We conclude by a final union bound on the event  $\{\Phi_{\text{hyb}}(\mathbf{Y}) \geq B_1 \cup \Phi_{\text{hyb}}(\mathbf{Y}) \geq B_2\}$ , we obtain with probability  $1 - \delta$ ,

$$\Phi_{\text{hyb}}(\mathbf{Y}) \leq \min(B_1, B_2)$$

□
